# Supplementary material
Source: MDPI journal article supplement (https://www.mdpi.com/2077-0472/12/10/1627)
Supplement: s1 [file s1]

**Table S2.** Primers sequences used for quantitative RT-PCR.

| Gene    | Primer sequence (5' - 3')                                | Annealing temperature<br>(°C) | Product size<br>(bp) |
|---------|----------------------------------------------------------|-------------------------------|----------------------|
| β-Actin | F: TGGAACGGTGAAGGTGACAGC<br>R: GCTTTTGGGAAGGCAGGGACT     | 60                            | 177                  |
| DMT1    | F: GCAGGTGGTTGACGTCTGTA<br>R: CACGCCCCCTTTGTAGTAGT       | 60                            | 100                  |
| PePT1   | F: AAGATGAAATGTGAGCGTATGGG<br>R: TTACTCGGCTGGTTTTTTGAGTG | 60                            | 115                  |
| CAT1    | F: TCTTTGCAGGTCGTTTGGGA<br>R: GGCTGATCACCTGTTGGAGT       | 60                            | 100                  |
| ZnT1    | F: TGCTCTGCATGCTGTTACTGA<br>R: TGGAAGGACTCCGAGAGCAT      | 60                            | 97                   |
| SGLT1   | F: GCAACAGCAAAGAGGAGCGTAT<br>R: GCCACAAAACAGGTCATAGGTC   | 60                            | 110                  |
| GLUT2   | F: GACACGTTTTGGGTGTTCCG<br>R: GAGGCTAGCAGATGCCGTAG       | 60                            | 149                  |

<sup>1</sup>DMT1, divalent metal transporter-1; PePT1, peptide-transporter-1;

<sup>2</sup> CAT1, cationic amino acid transporter-1; ZnT1, Zinc transporter-1; GLUT2, glucosetransporter-2; SGLT1, Na<sup>+</sup>-dependent glucose transporter-1.
