# Supplementary material
Source: MDPI journal article supplement (https://www.mdpi.com/2077-0472/12/10/1627)
Supplement: s1 [file s1]

**Table S1** Composition and nutrient level of experimental diet.

| <b>Ingredients</b>          | <b>%</b> | <b>Nutrient level</b>     | <b>contents</b> |
|-----------------------------|----------|---------------------------|-----------------|
| Corn                        | 26.54    | Digestible energy (MJ/kg) | 14.6            |
| Extruded corn               | 27.66    | Crude Protein (%)         | 19.42           |
| Soybean protein concentrate | 2.80     | Calcium (%)               | 0.85            |
| Fish meal                   | 3.00     | Available phosphorus (%)  | 0.43            |
| casein                      | 12.00    | Lysine                    | 1.49            |
| Sucrose                     | 5.00     | Methionine                | 0.45            |
| Soybean oil                 | 4.00     | Iron(mg/kg) <sup>3</sup>  | 25.8            |
| lactose                     | 8.00     |                           |                 |
| glucose                     | 8.00     |                           |                 |
| cellulose                   | 1.20     |                           |                 |
| Dicalcium phosphate         | 0.50     |                           |                 |
| NaCl                        | 0.30     |                           |                 |
| L -LysineHCl (78%)          | 0.39     |                           |                 |
| Chloride choline            | 0.10     |                           |                 |
| Vitamin premix <sup>1</sup> | 0.01     |                           |                 |
| Mineral premix <sup>2</sup> | 0.5      |                           |                 |
| Total                       | 100      |                           |                 |

<sup>1</sup> The vitamin premix provided the following per kg of diet: 9000 IU of VA, 3000 IU of VD 3, 20 IU of VE, 3 mg of VK3, 1.5 mg of VB1, 4 mg of VB2, 3 mg of VB6, 0.2 mg of VB12, 30 mg of niacin, 15 mg of pantothenic acid, 0.75 mg of folic acid, and 0.1 mg of biotin.

<sup>2</sup> The mineral premix provided the following per kg of diet: 6 mg Cu, 100 mg Zn, 4 mg Mn, 0.30 mg.

<sup>3</sup> The content of iron was measured value.
